# Supplementary material for: A better understanding of the capacity fading mechanisms of Li3V2(PO4)3
Source: Royal Society of Chemistry journal article supplement (doi:10.1039/c5ra11510h), 2015-01-01
Supplement: c5ra11510h1.pdf [file c5ra11510h1.pdf]

Supporting information

**A Better Understanding of the Capacity Fading Mechanisms of  $\text{Li}_3\text{V}_2(\text{PO}_4)_3$**

Liping Wang\*, Jin Xu, Chong Wang, Xumei Cui, Jingze Li, Yong-Ning Zhou\*

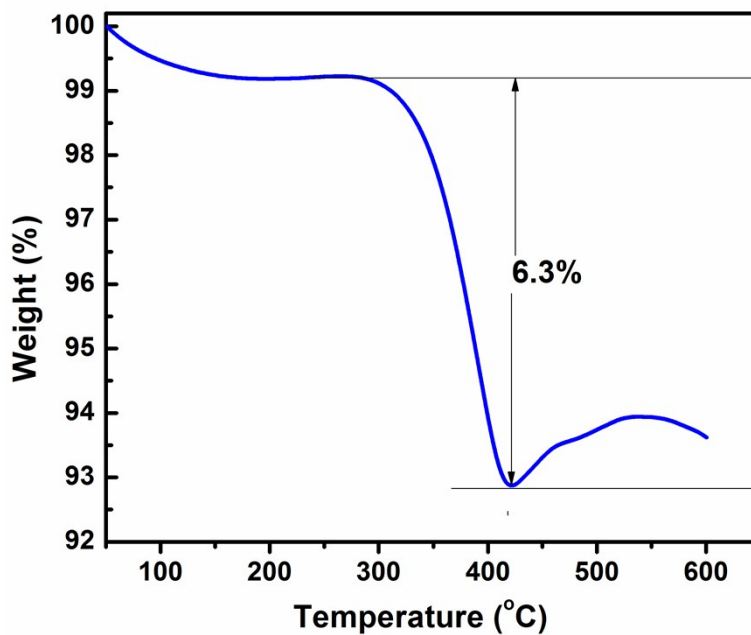

**Figure S1** Thermo-gravimetric analyzer (TGA) curves of as-obtained  $\text{Li}_3\text{V}_2(\text{PO}_4)_3$  during heating in air at a heating rate of 10 °C/minutes.

---

\* Corresponding author. +86 28 83207620. Fax: +86 28 83202569.

E-mail addresses: [lipingwang@uestc.edu.cn](mailto:lipingwang@uestc.edu.cn) (L. Wang), [ynzhou@fudan.edu.cn](mailto:ynzhou@fudan.edu.cn) (Y. N. Zhou)

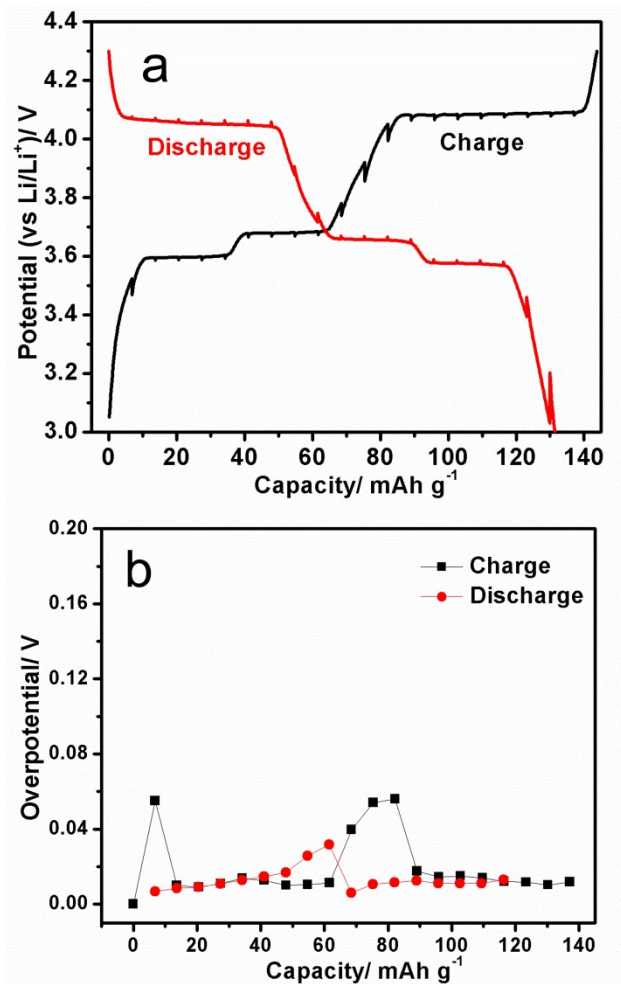

**Figure S2** (a) GITT curves plotted with the voltage as a function of specific capacity in the voltage window 3.0-4.3 V. The current density is set at  $13 \text{ mA g}^{-1}$  with a relaxation time of 4 hours; (b) The overpotential value as a function of specific capacity in the charge process.

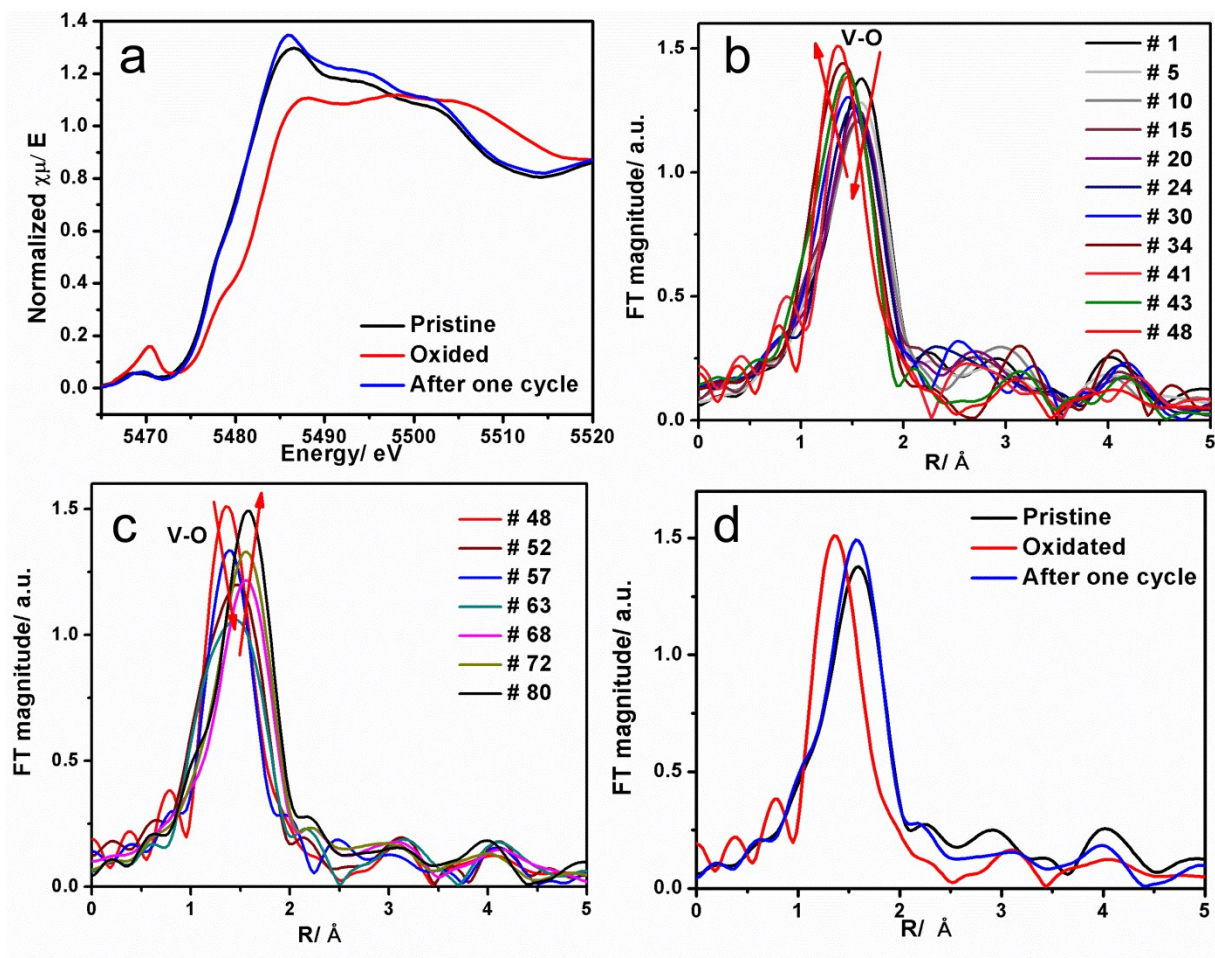

**Figure S3** (a) V-K edge XANES spectra of LVP for the pristine, charge to 4.8 V and discharge to 3.0 V; (b) Selected Fourier transform spectra of  $k^3$ -weighted V EXAFS spectra of LVP during charge process; (c) Selected Fourier transform spectra of  $k^3$ -weighted V EXAFS spectra of LVP during discharge process; (d) Comparison of the Fourier transform spectra of  $k^3$ -weighted V EXAFS spectra of LVP for the pristine, charged to 4.8 V and discharge to 3.0 V.

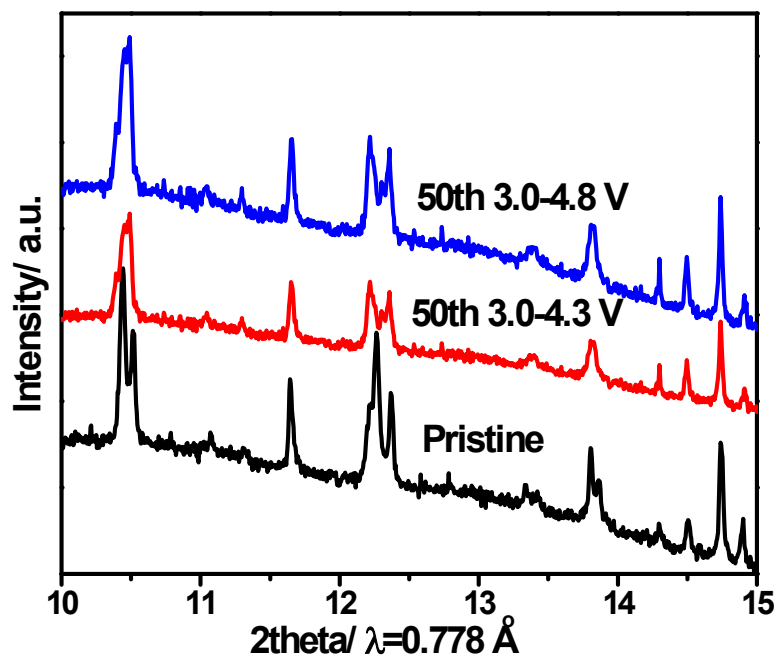

**Figure S4** XRD patterns of the pristine LVP electrode and the electrodes after 50 cycles in the voltage windows: 3.0-4.3 V and 3.0-4.8 V.

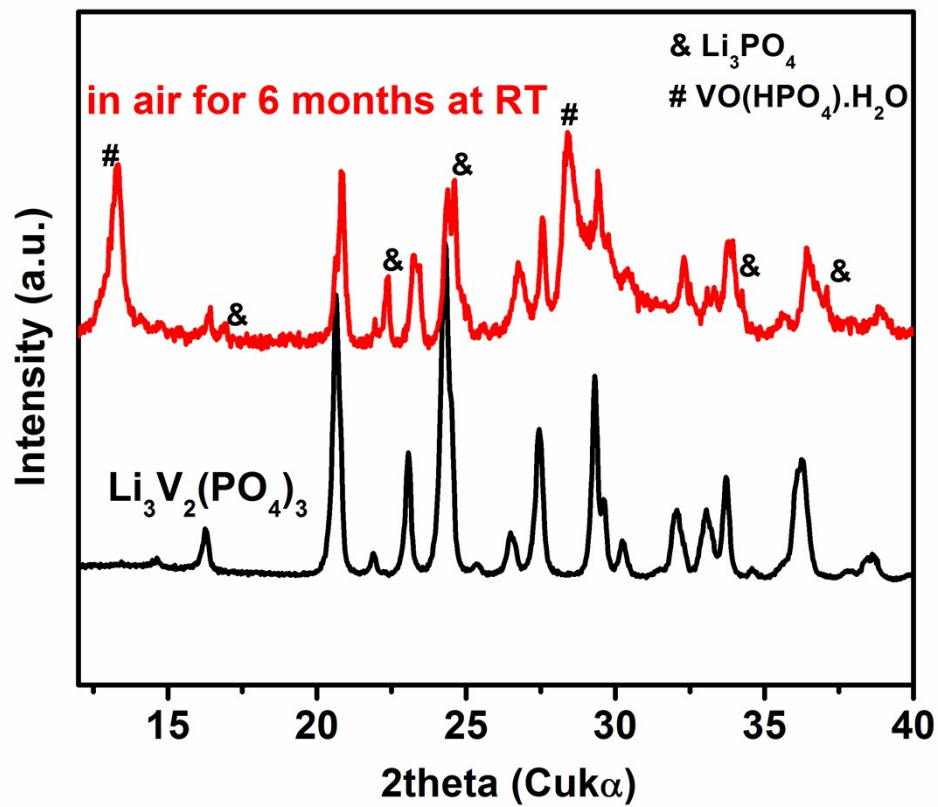

**Figure S5** XRD patterns of  $\text{Li}_3\text{V}_2(\text{PO}_4)_3$  exposed in air at room temperature after 6 months.

**Table S1** V K-edge EXAFS structure parameters of LVP at different charge-discharge states.

| Samples        | Path | $r/\text{\AA}$      | $\sigma^2 / 10^{-3} \text{\AA}^2$ | $\Delta E/\text{eV}$ | $R$   |
|----------------|------|---------------------|-----------------------------------|----------------------|-------|
| LVP_pristine   | V-O1 | $1.91(6) \pm 0.027$ | $7.22 \pm 4.21$                   | $17.43 \pm 3.58$     | 0.008 |
|                | V-O2 | $2.06(8) \pm 0.025$ | $5.10 \pm 3.86$                   |                      |       |
|                | V-P  | $3.43(1) \pm 0.044$ | $1.82 \pm 5.04$                   |                      |       |
| LVP_ch 4.0V    | V-O1 | $1.86(6) \pm 0.027$ | $7.25 \pm 3.72$                   | $15.29 \pm 3.84$     | 0.015 |
|                | V-O2 | $2.01(8) \pm 0.027$ | $4.75 \pm 3.67$                   |                      |       |
|                | V-P  | $3.40(1) \pm 0.047$ | $0.92 \pm 5.38$                   |                      |       |
| LVP_ch 4.8V    | V-O1 | $1.79(3) \pm 0.018$ | $11.08 \pm 2.26$                  | $9.76 \pm 3.48$      | 0.011 |
|                | V-O2 | $1.94(3) \pm 0.020$ | $8.00 \pm 2.47$                   |                      |       |
|                | V-P  | $3.27(1) \pm 0.120$ | $9.93 \pm 18.40$                  |                      |       |
| LVP_disch 3.9V | V-O1 | $1.81(2) \pm 0.028$ | $4.78 \pm 3.66$                   | $16.87 \pm 3.57$     | 0.008 |
|                | V-O2 | $1.97(3) \pm 0.027$ | $2.61 \pm 3.49$                   |                      |       |
|                | V-P  | $3.31(4) \pm 0.062$ | $5.78 \pm 7.50$                   |                      |       |
| LVP_disch 3.0V | V-O1 | $1.91(6) \pm 0.027$ | $7.38 \pm 4.46$                   | $10.48 \pm 4.38$     | 0.007 |
|                | V-O2 | $2.06(5) \pm 0.025$ | $5.18 \pm 4.04$                   |                      |       |
|                | V-P  | $3.43(7) \pm 0.062$ | $1.94 \pm 7.93$                   |                      |       |

$r$ : bond length;  $\sigma^2$ : Debye-Waller factor (disorder);  $\Delta E$ : inner shell potential shift;  $R$ : R-factor.

**Table S2** Lattice parameters of LVP before and after 50 cycles.

|                             | $a$ (Å) | $b$ (Å) | $c$ (Å) | $\beta$ | $V$ (Å <sup>3</sup> ) |
|-----------------------------|---------|---------|---------|---------|-----------------------|
| pristine                    | 8.61    | 8.59    | 12.04   | 90.57   | 890.70                |
| After 50 cycles (3.0-4.3 V) | 8.51    | 8.55    | 11.87   | 90.55   | 863.53                |
| After 50 cycles (3.0-4.8 V) | 8.49    | 8.73    | 11.87   | 90.52   | 879.34                |
